# Supplementary material for: Canonical NF-κB signaling pathway and GRO-α/CXCR2 axis are activated in unruptured intracranial aneurysm patients
Source: PubMed Central journal article supplement (PMC9734124; doi:10.1038/s41598-022-25855-2), 2022-12-09
Supplement: 41598_2022_25855_MOESM1_ESM.pdf [file 41598_2022_25855_MOESM1_ESM.pdf]

**Table S1.** Cerebrospinal fluid, serum, and Quotient results for unruptured intracranial aneurysm patients and the control individuals without vascular lesions in the brain.

|                           | Control group<br>N=10 | UIA group<br>N=25 | 2-tailed p-value |
|---------------------------|-----------------------|-------------------|------------------|
| CSF                       |                       |                   |                  |
| NF- $\kappa$ B p65, pg/ml | 4.1 (3.7-8.2)         | 3.6 (3.0-4.2)     | 0.03             |
| GRO- $\alpha$ , pg/ml     | 18.5 (14.0-22.9)      | 26.4 (12.3-38.7)  | 0.01             |
| CXCR2, ng/ml              | 0.25 (0.11-0.69)      | 0.64 (0.47-0.84)  | 0.03             |
| Serum                     |                       |                   |                  |
| NF- $\kappa$ B p65, pg/ml | 57.2 (19.1-267.3)     | 8.6 (5.8-58.5)    | 0.02             |
| GRO- $\alpha$ , pg/ml     | 14.5 (10.6-28.0)      | 13.0 (11.7-18.0)  | 0.69             |
| CXCR2, ng/ml              | 0.25 (0.11-0.67)      | 0.17 (0.07-0.23)  | 0.11             |
| Quotient                  |                       |                   |                  |
| NF- $\kappa$ B p65        | 0.07 (0.01-0.22)      | 0.45 (0.09-0.56)  | 0.01             |
| GRO- $\alpha$             | 1.10 (0.73-1.76)      | 1.92 (1.13-3.14)  | 0.04             |
| CXCR2                     | 1.76 (0.62-4.25)      | 4.17 (2.27-10.25) | 0.03             |

**Abbreviations:** CSF, Cerebrospinal fluid; CXCR2, C-X-C Motif Chemokine Receptor 2; GRO- $\alpha$ , GRO alpha chemokine; N, number of cases; NF- $\kappa$ B p65, nuclear factor kappa-B p65 subunit; UIA, unruptured intracranial aneurysm. The Quotient was calculated by dividing the CSF protein value by the serum protein value.
